# Supplementary material
Source: PubMed Central journal article supplement (PMC5684706)

**A**

— Adjacent Lung (Low Ratio Tumor group) (n=14)  
— Adjacent Lung (High Ratio Tumor group) (n=15)

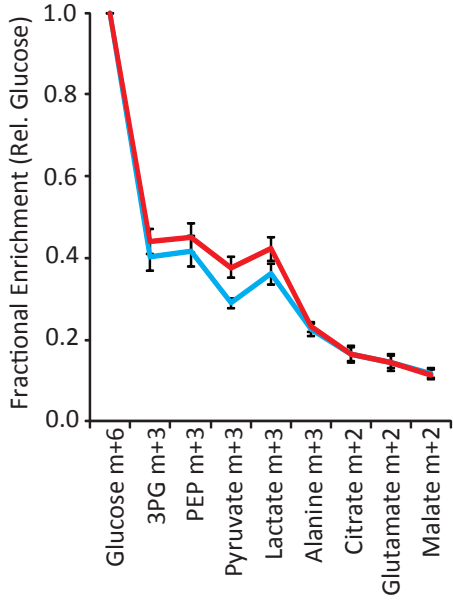**B**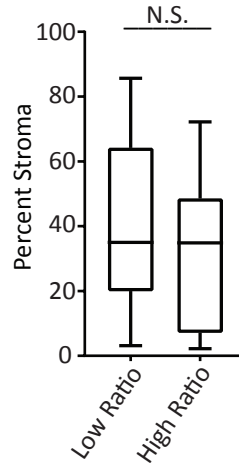

Supplement: NIHMS906743-supplement-Figure_S1.pdf [file NIHMS906743-supplement-Figure_S1.pdf]
