# Supplementary material
Source: PubMed Central journal article supplement (PMC5684706)

**A**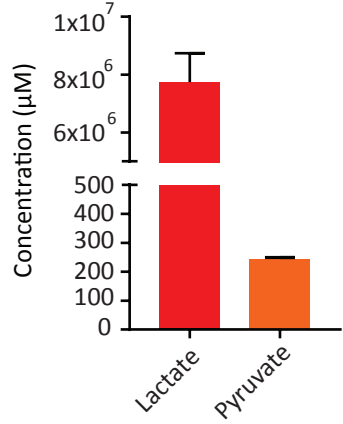**B**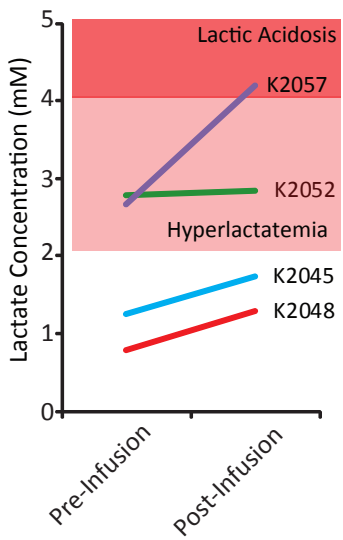**C**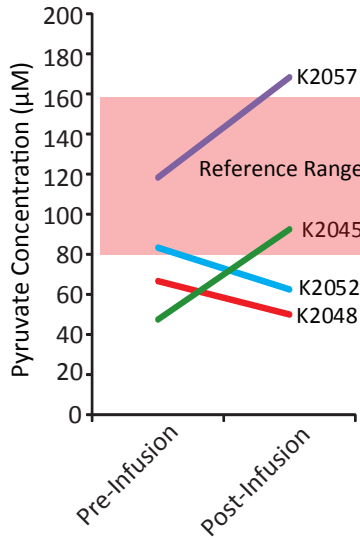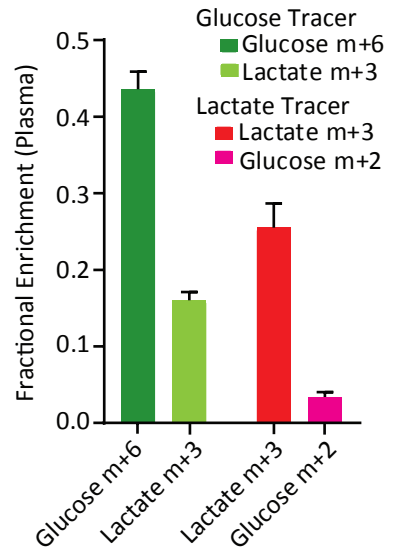

Supplement: NIHMS906743-supplement-Figure_S2.pdf [file NIHMS906743-supplement-Figure_S2.pdf]
