# Supplementary material
Source: PubMed Central journal article supplement (PMC5684706)

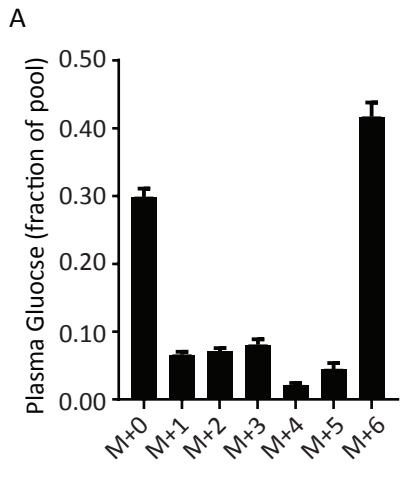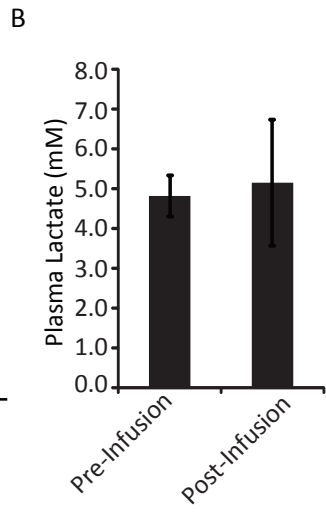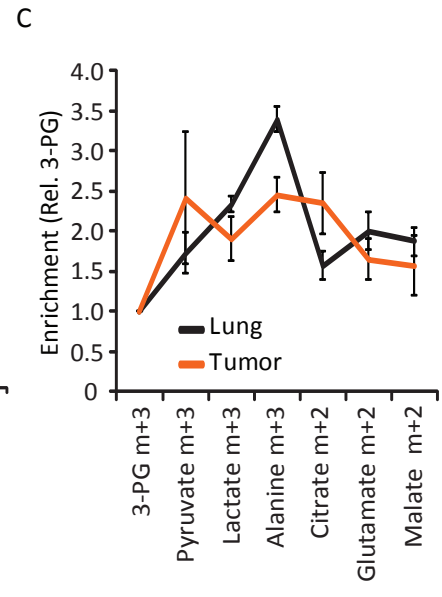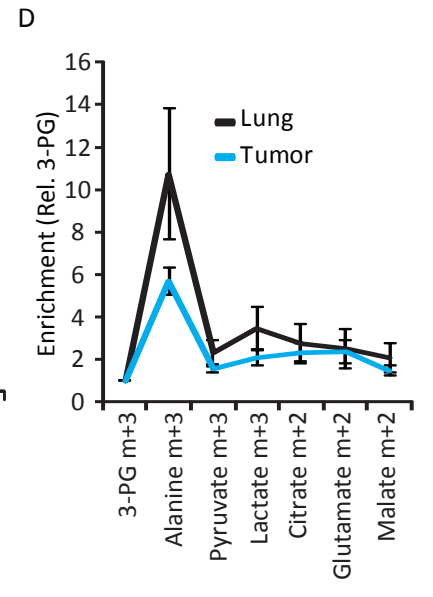

Supplement: NIHMS906743-supplement-Figure_S3.pdf [file NIHMS906743-supplement-Figure_S3.pdf]
